# Supplementary material for: A fluid-walled microfluidic platform for human neuron microcircuits and directed axotomy
Source: Lab Chip. 2024 Jun 6;24(13):3252–64. doi: 10.1039/d4lc00107a (PMC11198392; doi:10.1039/d4lc00107a)
Supplement: LC-024-D4LC00107A-s001 [file LC-024-D4LC00107A-s001.pdf]

# 1 Supplementary Information

## 2 A fluid-walled microfluidic platform for human neuron microcircuits and directed axotomy

3 Federico Nebuloni, Quyen B. Do, Peter R. Cook, Edmond J. Walsh, and Richard Wade-Martins

4

### 5 Determination of concentration gradients in dumbbells

6 Consider the dumbbell in Supplementary Figure 2, where chambers are filled with equal volumes, and

7 transport of molecules through the conduit is driven only by diffusion to generate a concentration

8 gradient from right to left. Prediction of those gradients represents a crucial step in understanding the

9 roles of target-derived signals like BDNF or other MSN-derived factors. Using Fick's 2<sup>nd</sup> law, concentration

10 ( $c(x,t)$ ) in the conduit can be approximated by the solution to the one-dimensional diffusion equation for

11 a semi-infinite medium with constant concentration at the boundary <sup>1</sup>

$$c(x,t) = C_0 \operatorname{erfc}\left(\frac{x}{2\sqrt{Dt}}\right) \quad (\text{S1})$$

12 with  $C_0$  being the initial concentration in the right-hand chamber, D the diffusion coefficient, and x and t

13 being space and time respectively. Equation S1 allows estimation of the time necessary for the gradient

14 to reach steady state ( $t_{steady}$ ), arbitrarily quantified as the time required for 30% of  $C_0$  to reach the other

15 end of the conduit  $(x = L), t_{steady} = \frac{1}{D} \left( \frac{L}{2 \operatorname{erfc}^{-1}(0.3)} \right)^2$ . The value of 30% is chosen so that the

16 maximum error between the gradient profile (Eq. S1) and the linearized approximation is smaller than

17 10%. Once steady state is reached, the concentration gradient can be considered linear and remain stable

18 for a time  $t = t_{linear}$ . Deriving from Fick's 1<sup>st</sup> law and defining it as the time needed for the concentration

19 in the left chamber to increase by 5% of  $C_0$ , one gets:

$$t_{linear} = 1.05 \frac{L m_{mol}}{D A_c C_0} \quad (\text{S2})$$

20 where  $m_{mol}$  is the mass of molecules transferred between chambers and  $A_c$  is the cross-sectional area of  
 21 the connecting conduit. Unlike conduits with solid walls that have fixed cross sections, ones with fluid  
 22 walls morph as pressures change. If conduit widths ( $2a_c$ ) remain unchanged (as fluid walls are firmly  
 23 pinned to the plastic substrate), heights ( $h_c$ ) vary depending on pressures applied. In particular, for a cross  
 24 section like in Supplementary Figure 2B and assuming  $h_c \ll a_c$  at all times, one can prove:

$$A_c = \left( \frac{a_c}{2h_c} \right) \left[ \left( \frac{a_c^3}{2h_c} \right) \sin^{-1} \left( \frac{2h_c}{a_c} \right) - a_c^2 + 2h_c^2 \right] \quad (S3)$$

25 where  $h_c$  cannot be considered constant. However, when both chambers enclose the same volume, the  
 26 dumbbell is in equilibrium and pressure is equal everywhere (Eq. 1). Such equivalence allows derivation  
 27 of a relationship between chamber and conduit heights:

$$h_c = \frac{(2a_c^2 h_{chamber})}{(a_{chamber}^2 + h_{chamber}^2)} - \Delta p g a_c^2 h_{chamber} \quad (S4)$$

28 With Equation 2, this directly relates chamber volumes and areas of conduit cross sections. Equation S4  
 29 has been derived assuming no hydrostatic head of pressure acts in the conduit. In Table S1, conduit  
 30 heights and areas are computed for a dumbbell containing 4  $\mu$ l in each chamber and diffusion  
 31 parameters are calculated for transport of BDNF ( $D = 12.6 \times 10^{-7} \text{ cm}^2/\text{s}$ ). Values are computed for  
 32 dumbbell geometries used ( $m_{mol} = 0.02 \text{ ng}$ ; growth:  $h_{chamber} = 1.07 \text{ mm}$ ,  $a_{chamber} = 1.42 \text{ mm}$ ;  
 33 regrowth:  $h_{chamber} = 0.85 \text{ mm}$ ,  $a_{chamber} = 1.67 \text{ mm}$ ) pre-axotomy to compare cortical axonal growth,  
 34 and post-axotomy to analyse regrowth. Supplementary Figure 2C illustrates the linear concentration  
 35 gradient of BDNF at  $t = t_{linear}$ , so that its concentration in the right chamber equals  $C_0 = 100 \text{ ng/ml}$   
 36 and the one in the left chamber is 15 ng/ml (10 ng/ml initially present in the chamber plus 5 ng/ml  
 37 transferred over  $t_{linear}$ ).

38

39 **References**

40 1 Crank J. *The Mathematics of Diffusion*. Clarendon Press, 1979.

41 2 Stroh M, Zipfel WR, Williams RM, Webb WW, Saltzman WM. Diffusion of nerve growth factor in  
42 rat striatum as determined by multiphoton microscopy. *Biophys J* 2003; **85**: 581–588.

43

44 **Supplementary Table 1. Geometrical parameters of dumbbells with different sizes and respective**  
45 **diffusion times of BDNF**  
46

| <b>Bio-assay</b> | <b>Conduit geometry</b> |                                   |                                    |                                    | <b>Diffusion parameters</b>     |                               |
|------------------|-------------------------|-----------------------------------|------------------------------------|------------------------------------|---------------------------------|-------------------------------|
|                  | <i>length [mm]</i>      | <i>width [<math>\mu m</math>]</i> | <i>height [<math>\mu m</math>]</i> | <i>area [<math>\mu m^2</math>]</i> | <i>t<sub>steady</sub> [min]</i> | <i>t<sub>linear</sub> [d]</i> |
| outgrowth        | 1                       | 200                               | 5                                  | 624                                | 60                              | 30                            |
| regrowth         | 0.5                     | 400                               | 13                                 | 3513                               | 15                              | 5                             |

48 **Supplementary table 2:** Primary antibodies

49

| Antibody                 | Target                                      | Host organism | Dilution | Source        | Cat #     | RRID            |
|--------------------------|---------------------------------------------|---------------|----------|---------------|-----------|-----------------|
| Anti-DARPP32, monoclonal | DARPP32                                     | Donkey        | 1:250    | Abcam         | ab40801   | RRID:AB_731843  |
| Anti-DARPP32, polyclonal | DARPP32                                     | Donkey        | 1:250    | Sigma-Aldrich | HPA048630 | RRID:AB_2680468 |
| Anti-MAP2, Polyclonal    | Microtubule-associated protein 2            | Donkey        | 1:250    | Abcam         | ab92434   | RRID:AB_2138147 |
| Anti-SMI312, monoclonal  | Neurofilament marker (pan axonal, cocktail) | Donkey        | 1:250    | Biolegend     | 837904    | RRID:AB_2566782 |

50

51

52 **Supplementary Table 3:** Secondary antibodies

| Antibody                                        | Target      | Host organism | Dilution | Source                   | Cat #   | RRID                                  |
|-------------------------------------------------|-------------|---------------|----------|--------------------------|---------|---------------------------------------|
| Alexa-Fluor 647                                 | IgG Mouse   | Donkey        | 1:1000   | Invitrogen               | A31571  | RRID:AB_162542                        |
| Alexa-Fluor 647                                 | IgG Rabbit  | Donkey        | 1:1000   | Invitrogen               | A-31570 | RRID:AB_2536180                       |
| Alexa Fluor 555                                 | IgG Chicken | Donkey        | 1:1000   | LifeTechnology           | A78949  | RRID:AB_2921071                       |
| DAPI (4',6-Diamidino-2-Phenylindole, Dilactate) | DAPI        | NA            | 1:1000   | Thermo Fisher Scientific | D1306   | RRID:AB_2307445 or<br>RRID:AB_2629482 |

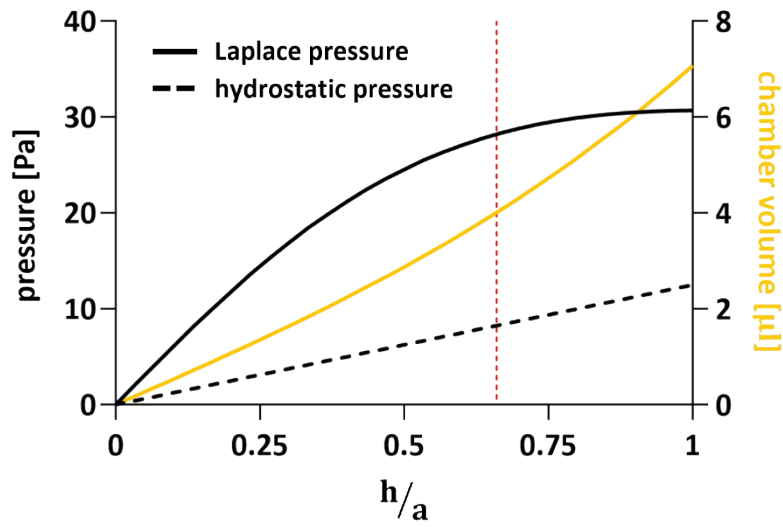

**Supplementary Figure 1. Pressures and volumes.**

Chart shows Laplace pressure (solid black), hydrostatic pressure (dashed black), and volumes (yellow) for chambers used in this work as the central height varies in the range  $0 \leq h \leq a$  (where  $h = a$  corresponds to a  $90^\circ$  contact angle with the substrate). Chambers are approximated as circular drops where  $a$  represents the footprint radius,  $a = 1.5 \text{ mm}$ . The vertical dashed red line represents the upper limit of the experimental setup.

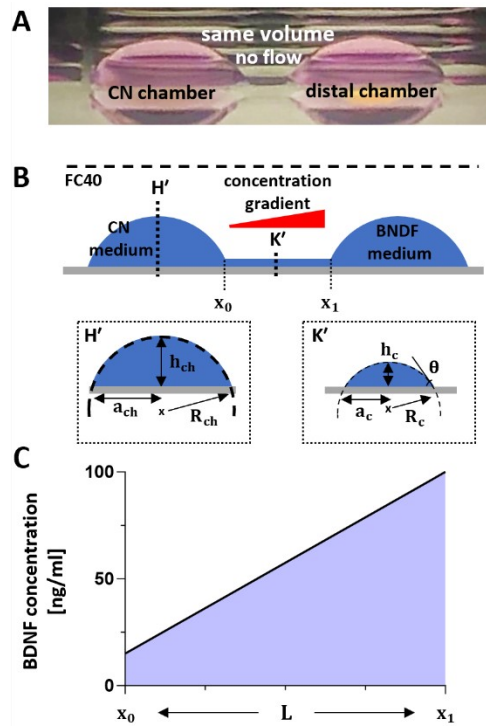

**Supplementary Figure 2. Diffusion gradients in fluid-walled dumbbells.**

**(A)** Side view of dumbbell with 4  $\mu$ l in each chamber. In all examples shown here and elsewhere, the left-hand one hosts cortical neurons.

**(B)** Schematic of dumbbell with equal volumes. In this case, BDNF molecules diffuse through the conduit, so any axons from CNs will sense a concentration gradient. Lower panels show central cross sections of a chamber and connecting conduit which have shapes of circular segments (as they are bounded by liquid interfaces).

**(C)** Linear approximation of BDNF concentration gradient inside the conduit at  $t = t_{linear}$ , when the left chamber ( $x < x_0$ ) contains cortical maturation medium (initially  $C_{BDNF} = 10\text{ng/ml}$ ) and the right one ( $x > x_1$ ) contains cortical maturation medium with 10-fold BDNF concentration.

### Culturing process (side and top view) and timeline summary

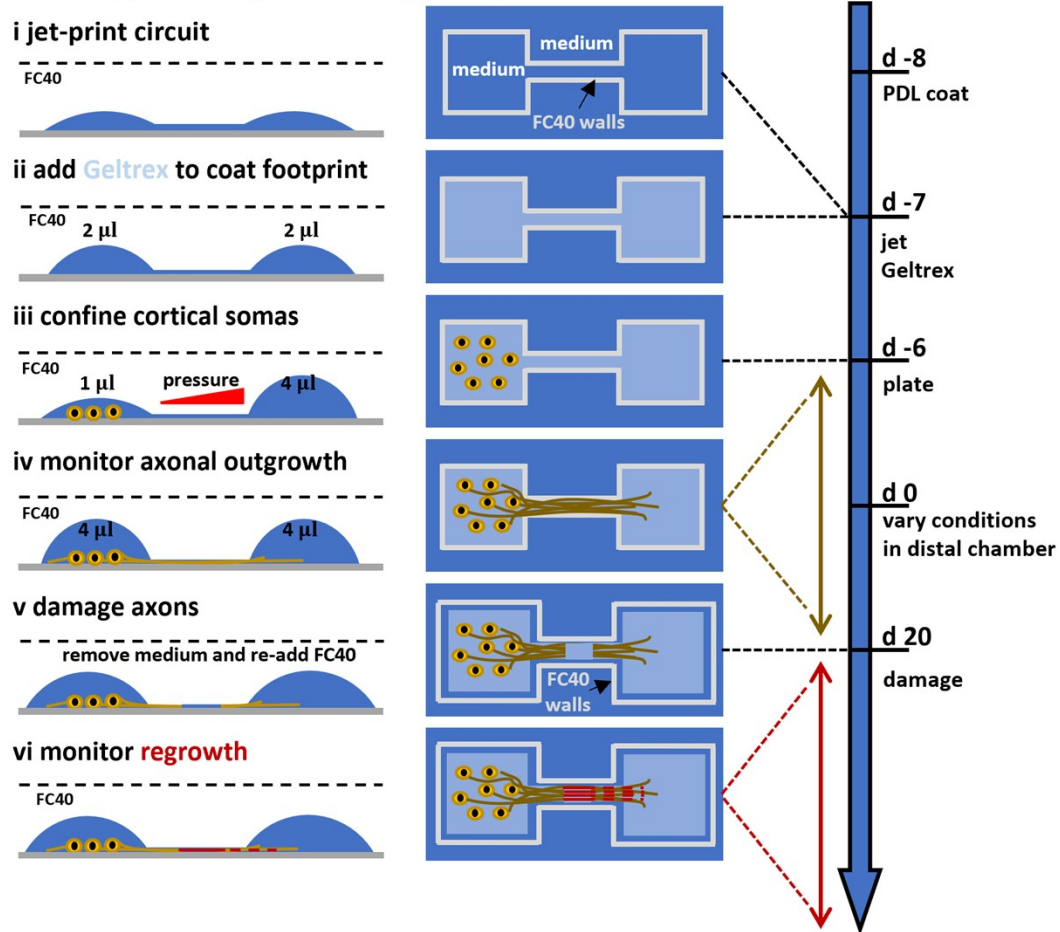

### Supplementary Figure 3. Culturing neurons in fluid-walled dumbbells.

Overview of most relevant steps followed to culture CNs and perform axotomy in fluid walled dumbbells (top view, side view, and timeline). The culturing protocol is summarised (from d -8 and d 20) between (i) and (iv). The axotomy assay (from d 20 onwards) is shown in (v) and (vi).

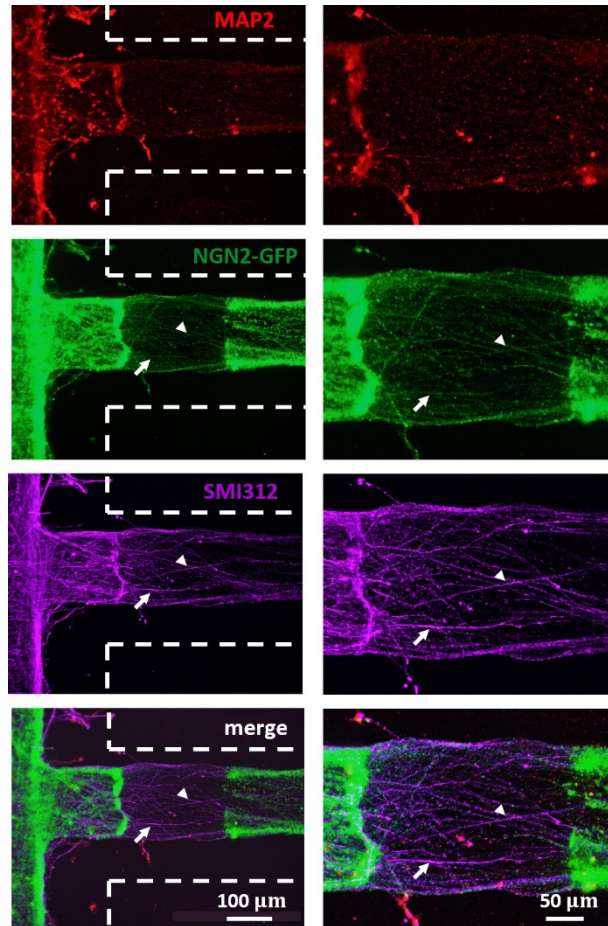

**Supplementary Figure 4. Regeneration after axotomy.**

NGN2-transfected CNs project axons through the conduit. After 26 days of culture, dumbbells are destroyed, axons damaged and new dumbbells re-built to monitor regrowth of axons. Immunostaining images captured 5 days post axotomy show neuronal-domain markers (MAP2 – red – dendrites, SMI312 – purple – axons) and CN marker NGN2-GFP (green). All regenerated neurites are cortical as they express SMI312 and NGN2-GFP, while dendritic MAP2 is absent (arrow and arrowhead mark two examples). Dashed lines indicate the approximate position of the edges of the newly-built footprint; most regenerated neurites are confined to the footprint of the original dumbbell and the Geltrex coat.
